# Supplementary material
Source: MDPI journal article supplement (https://www.mdpi.com/1999-4907/14/5/961)
Supplement: s1 [file s1 › Supplemental figure.pdf]

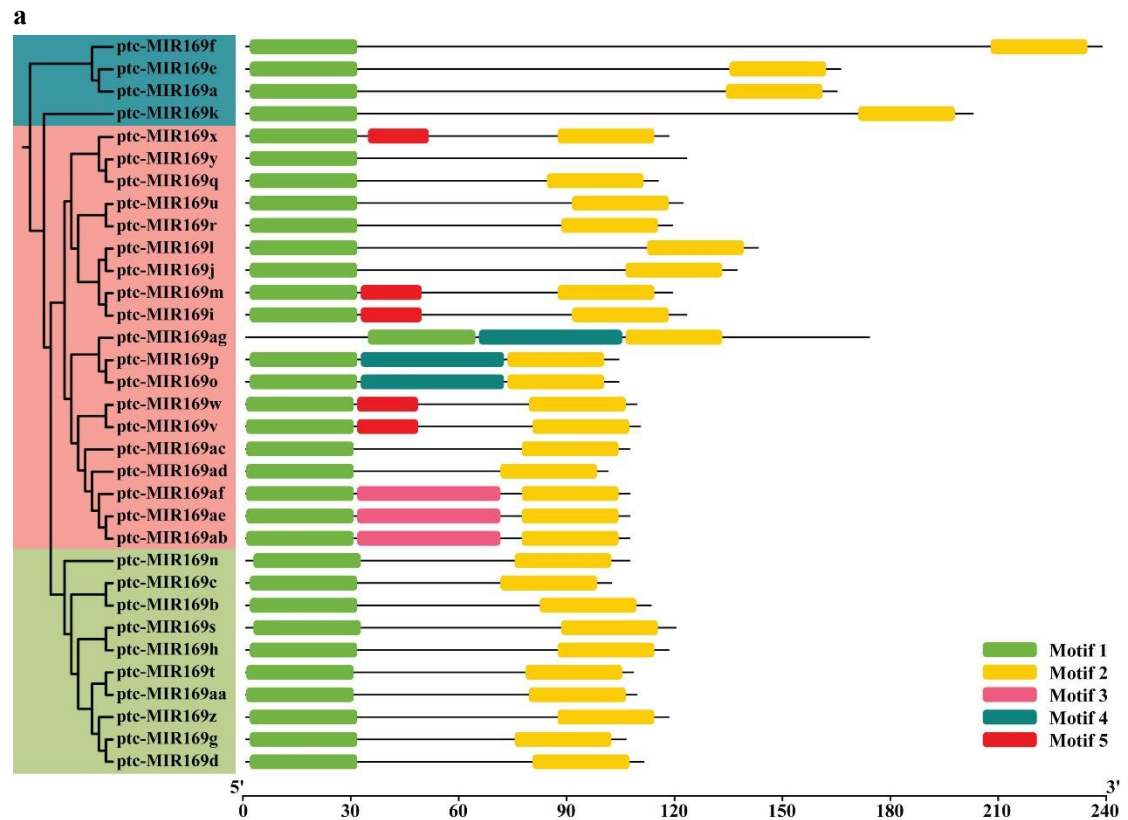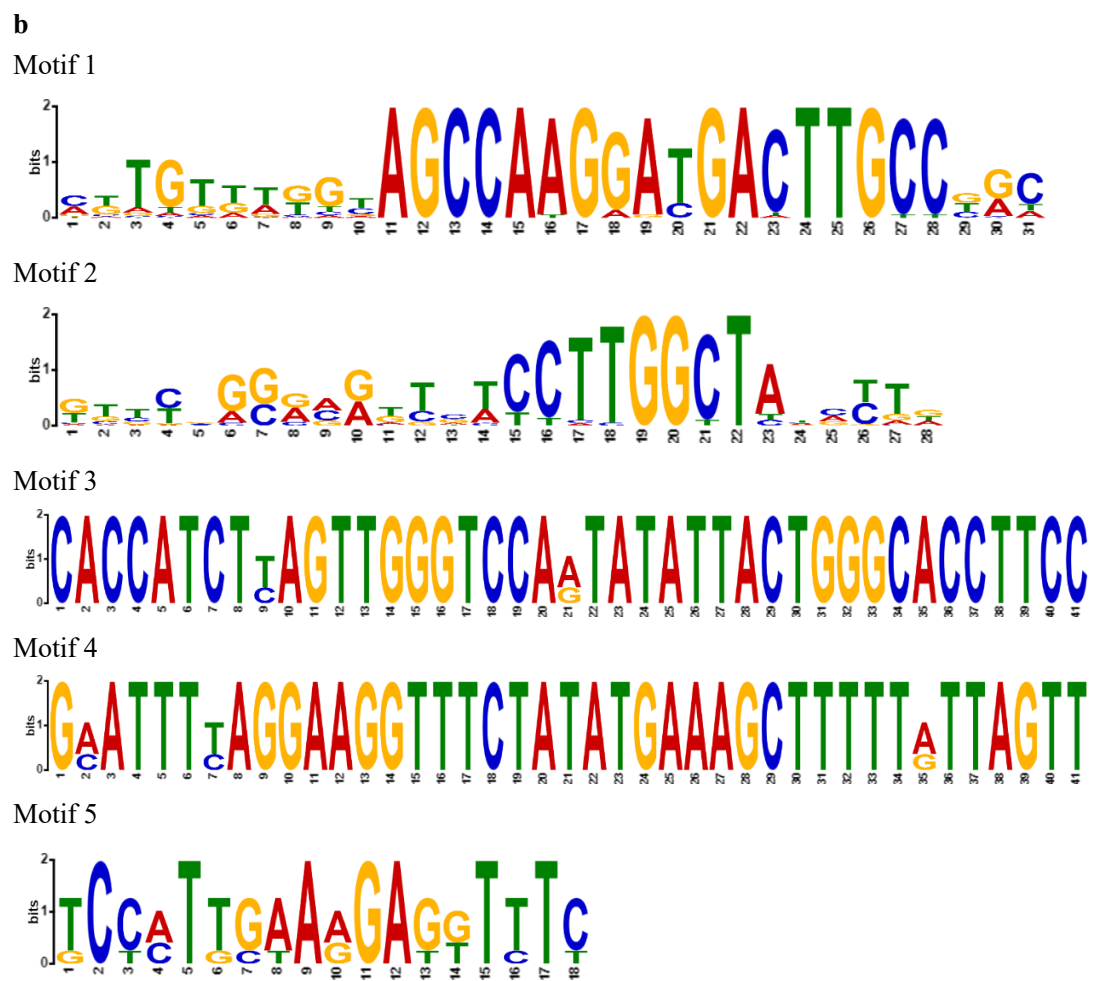

**Figure S1. a Distribution of the conserved motifs in MIR169s analyzed by MEME. Five motifs are marked by different colors. b Logo chart of the conserved motifs identified in ptc-MIR169s. The tree shown in this figure is the same as in Figure 1.**
