# Supplementary material
Source: MDPI journal article supplement (https://www.mdpi.com/1999-4907/14/5/961)
Supplement: s1 [file s1 › Supplemental files.pdf]

**Table S1. Precursor sequences and lengths of *Populus trichocarpa*, *Vitis vinifera*, and *Arabidopsis thaliana* in miR169s.**

| Populus trichocarpa |          |        | Arabidopsis thaliana |          |        | Vitis vinifera |          |        |
|---------------------|----------|--------|----------------------|----------|--------|----------------|----------|--------|
| MIRNA               | Sequence | Length | MIRNA                | Sequence | Length | MIRNA          | Sequence | Length |
| ptc-MIR169a         | AAGUGGU  | 165    | ath-MIR169a          | GUGACGA  | 226    | vvi-MIR169a    | GAGAGUG  | 124    |
| ptc-MIR169aa        | GUAGAGA  | 109    | ath-MIR169b          | CCCAACGG | 181    | vvi-MIR169b    | GGGGUCG  | 105    |
| ptc-MIR169ab        | CUUGUUU  | 107    | ath-MIR169c          | UCGUCCAL | 411    | vvi-MIR169c    | GGGAGUA  | 90     |
| ptc-MIR169ac        | UCUUGUU  | 107    | ath-MIR169d          | GUAUCAU  | 154    | vvi-MIR169d    | GAGUGGA  | 120    |
| ptc-MIR169ad        | GAUGUUC  | 101    | ath-MIR169e          | UGAUGAU  | 217    | vvi-MIR169e    | GUCUUGU  | 149    |
| ptc-MIR169ae        | CUUGUUU  | 107    | ath-MIR169f          | GGGUCUU  | 167    | vvi-MIR169f    | GAUAUUA  | 184    |
| ptc-MIR169af        | CCUGUUU  | 107    | ath-MIR169g          | UGCCUAU  | 379    | vvi-MIR169g    | GAAAGUA  | 121    |
| ptc-MIR169ag        | UGAGAGA  | 174    | ath-MIR169h          | UCAUAUA  | 190    | vvi-MIR169h    | AGGGUGG  | 101    |
| ptc-MIR169b         | AAGAUUG  | 113    | ath-MIR169i          | GAAGGAG  | 206    | vvi-MIR169i    | AGGGUGG  | 105    |
| ptc-MIR169c         | AAGUUUG  | 102    | ath-MIR169j          | GAGUAUA  | 221    | vvi-MIR169j    | GAGAGUG  | 122    |
| ptc-MIR169d         | GAGUCGA  | 111    | ath-MIR169k          | UUAGAAG  | 213    | vvi-MIR169k    | GAGAGUG  | 122    |
| ptc-MIR169e         | UAUCGUG  | 166    | ath-MIR169l          | AUGAAGA  | 211    | vvi-MIR169l    | AGGGUGG  | 103    |
| ptc-MIR169f         | UUAUGUG  | 239    | ath-MIR169m          | UAGAAGG  | 212    | vvi-MIR169m    | AGAGUGG  | 102    |
| ptc-MIR169g         | GAGUAGA  | 106    | ath-MIR169n          | GAUGAAG  | 215    | vvi-MIR169n    | UGAGUGG  | 101    |
| ptc-MIR169h         | GAGUGUA  | 118    |                      |          |        | vvi-MIR169o    | AGGGUGG  | 103    |
| ptc-MIR169i         | UCUUGUU  | 123    |                      |          |        | vvi-MIR169p    | AGUGUGG  | 102    |
| ptc-MIR169j         | UCUUGUU  | 137    |                      |          |        | vvi-MIR169q    | AGGGUGG  | 97     |
| ptc-MIR169k         | UCUUGUU  | 203    |                      |          |        | vvi-MIR169r    | AGGGUGG  | 109    |
| ptc-MIR169l         | UCUUGUU  | 143    |                      |          |        | vvi-MIR169s    | GAAAGUG  | 99     |
| ptc-MIR169m         | UCUUGUU  | 119    |                      |          |        | vvi-MIR169t    | AGGGUGG  | 110    |
| ptc-MIR169n         | AGAGUGG  | 107    |                      |          |        | vvi-MIR169u    | AGGGUGG  | 110    |
| ptc-MIR169o         | CCUUGCGL | 104    |                      |          |        | vvi-MIR169v    | AGGGAGG  | 96     |
| ptc-MIR169p         | CCUUGCGL | 104    |                      |          |        | vvi-MIR169w    | GGUUAUG  | 143    |
| ptc-MIR169q         | UCUUGUU  | 115    |                      |          |        | vvi-MIR169x    | GUCUCGU  | 125    |
| ptc-MIR169r         | GAGGGUU  | 119    |                      |          |        | vvi-MIR169y    | CGUUGUU  | 248    |
| ptc-MIR169s         | AGAGUGU  | 120    |                      |          |        |                |          |        |
| ptc-MIR169t         | CUAGAGU  | 108    |                      |          |        |                |          |        |
| ptc-MIR169u         | GAGGGUU  | 122    |                      |          |        |                |          |        |
| ptc-MIR169v         | CGUGUUU  | 110    |                      |          |        |                |          |        |
| ptc-MIR169w         | CGUGUUU  | 109    |                      |          |        |                |          |        |
| ptc-MIR169x         | UGCUGUU  | 118    |                      |          |        |                |          |        |
| ptc-MIR169y         | UCUUGUU  | 123    |                      |          |        |                |          |        |
| ptc-MIR169z         | UAGUAGA  | 118    |                      |          |        |                |          |        |
